# Supplementary material
Source: PubMed Central journal article supplement (PMC4001557)
Supplement: JCI74589sd.pdf [file JCI74589sd.pdf]

**Supplemental Figure 1**

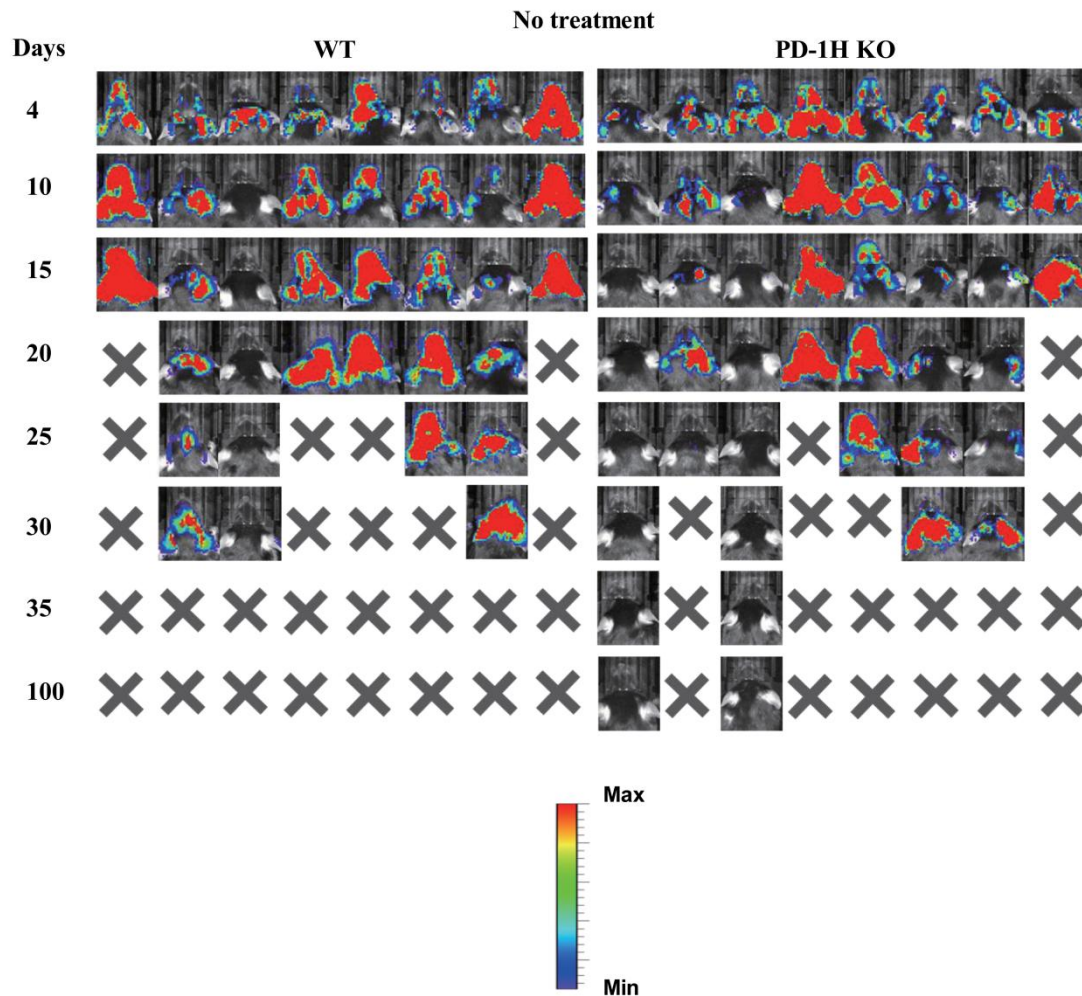

**Supplemental Figure 1.**  $3 \times 10^5$  GL261-luc cells in 20 $\mu$ l of PBS were injected into the left hemisphere of the brains of PD-1H KO mice or control littermates. Growth of GL261 tumors in individual mice was monitored by Lumina XR imaging system every 5 days. Bioluminescence images of individual mice are shown at indicated time points.

Supplemental Figure 2

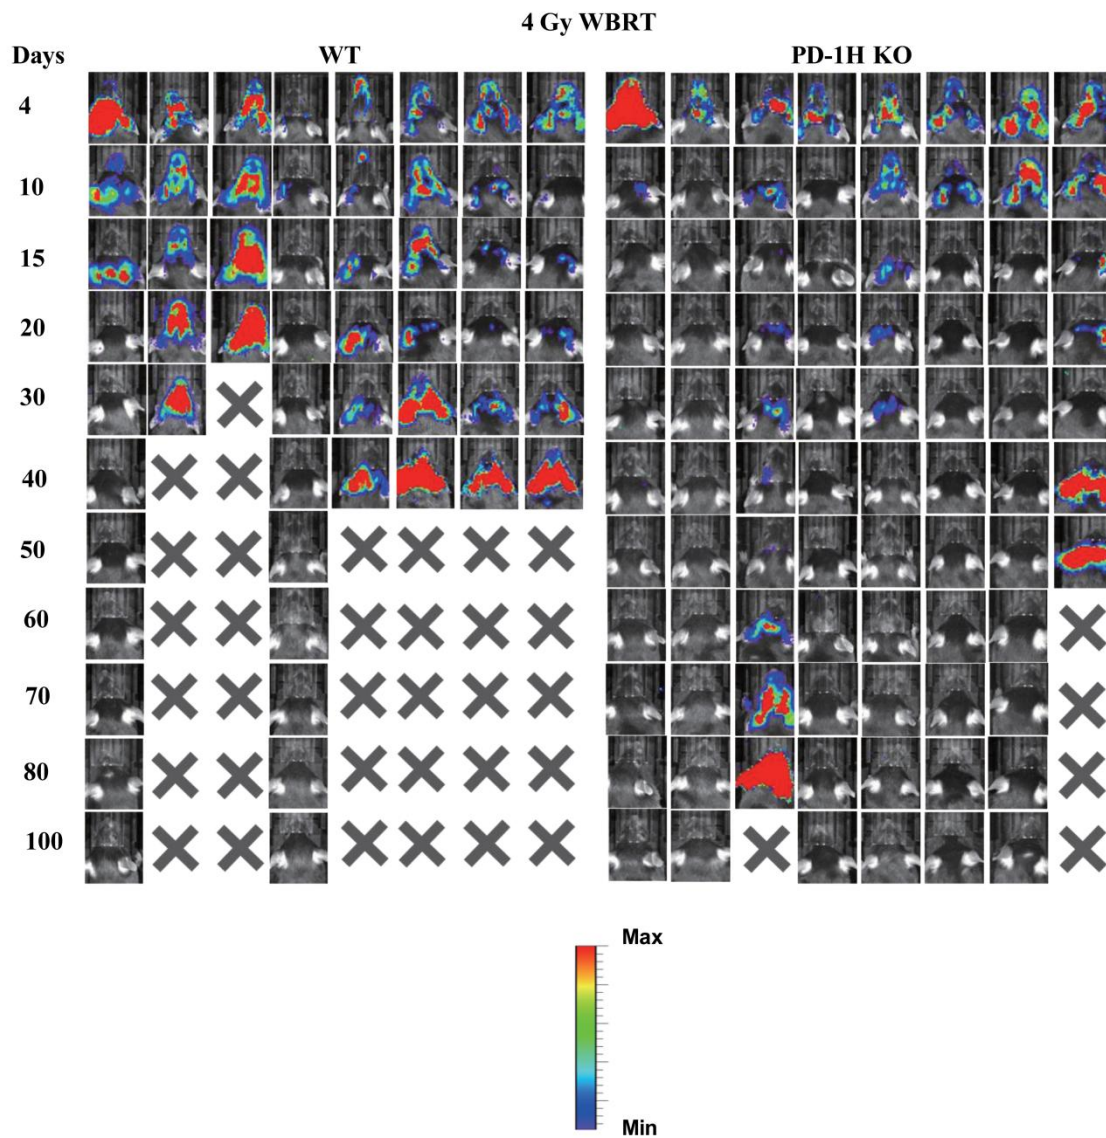

**Supplemental Figure 2.**  $3 \times 10^5$  GL261-luc cells in 20 $\mu$ l of PBS were injected into the left hemisphere of the brain of PD-1H KO mice or control littermates. All mice were treated with 4 Gy whole brain radiotherapy on day 5 after tumor inoculation. Growth of GL261 tumors in individual mice was monitored by Lumina XR imaging system every 5 days. Bioluminescence images of individual mouse are shown at indicated time points.

Supplemental Figure 3

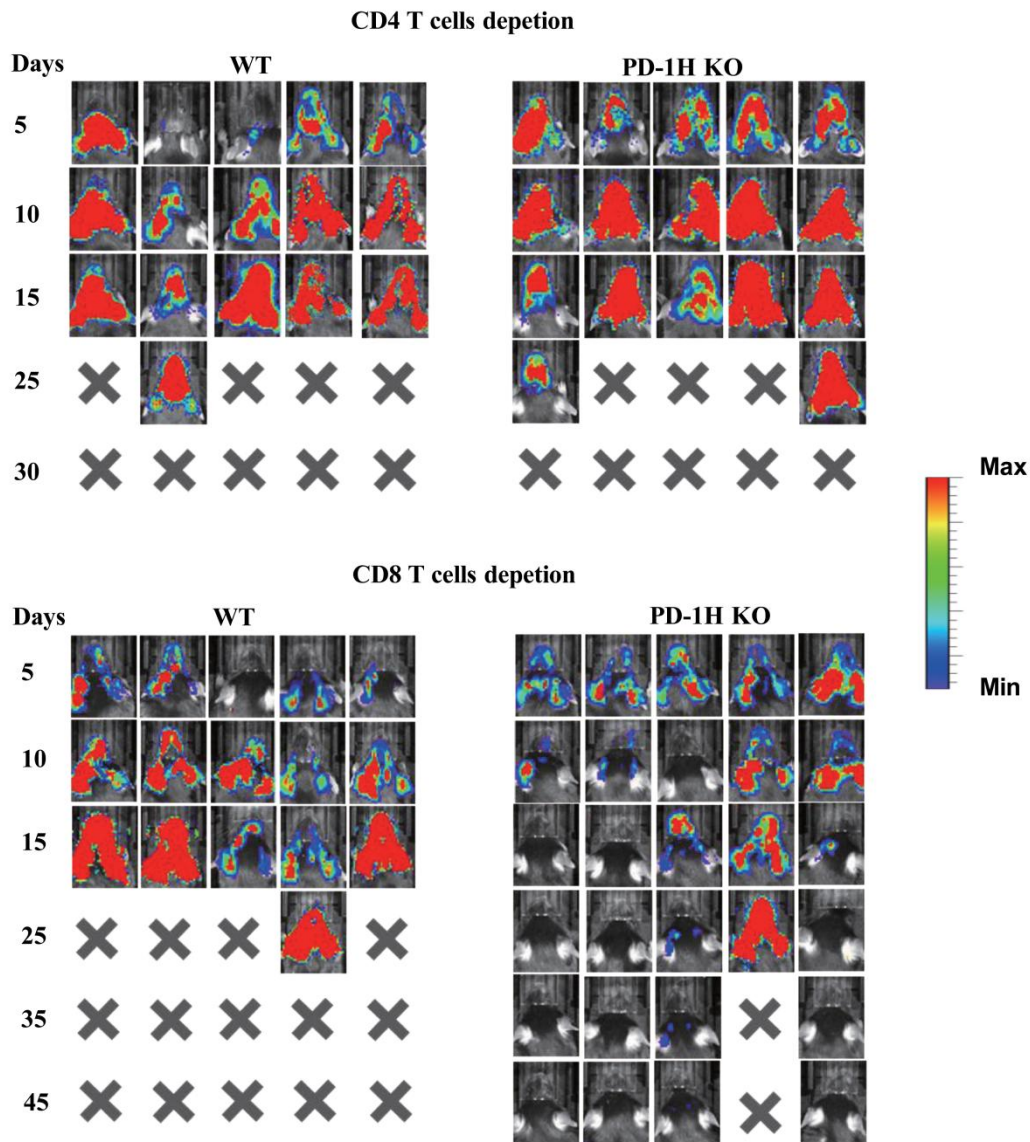

**Supplemental Figure 3.**  $3 \times 10^5$  GL261-luc cells in 20 $\mu$ l of PBS were injected into the left hemisphere of the brain of PD-1H KO mice or control littermates. All mice were treated with 4 Gy whole brain radiotherapy on day 5 after tumor inoculation. CD4<sup>+</sup> T cells or CD8<sup>+</sup> T cells were depleted by intraperitoneal injection of anti-CD4 (GK1.5) or anti-CD8 $\alpha$  (53-6.72) antibody every 5-7 days beginning five days before tumor inoculation. Growth of GL261 tumors in mice was monitored by Lumina XR imaging system every 5 days. Bioluminescent images of individual mice are shown at indicated time points.
